# Supplementary material for: Characterization of Bioactive Phenolics and Antioxidant Capacity of Edible Bean Extracts of 50 Fabaceae Populations Grown in Thailand
Source: MDPI journal article supplement (doi:10.3390/foods10123118), 2021-12-16
Supplement: s1 [file s1]

# Characterization of Bioactive Phenolics and Antioxidant Capacity of Edible Bean Extracts of 50 Fabaceae Populations Grown in Thailand

Duangjai Tungmunnithum <sup>1,2,3,\*</sup>, Samantha Drouet <sup>2</sup>, Jose Manuel Lorenzo <sup>4,5</sup> and Christophe Hano <sup>2,3,\*</sup>

<sup>1</sup> Department of Pharmaceutical Botany, Faculty of Pharmacy, Mahidol University, Bangkok 10400, Thailand; duangjai.tun@mahidol.ac.th (D.T.)

<sup>2</sup> Laboratoire de Biologie des Ligneux et des Grandes Cultures, INRAE USC1328, Campus Eure et Loir, Orleans University, 28000 Chartres, France; duangjai.tun@mahidol.ac.th (D.T.) ; samantha.drouet@univ-orleans.fr (S.D.) ; hano@univ-orleans.fr (C.H.)

<sup>3</sup> Le Studium Institute for Advanced Studies, 1 Rue Dupanloup, 45000 Orléans, France; duangjai.tun@mahidol.ac.th (D.T.) ; hano@univ-orleans.fr (C.H.)

<sup>4</sup> Centro Tecnológico de la Carne de Galicia, Adva. Galicia n° 4, Parque Tecnológico de Galicia, San Cibrao das Viñas, 32900 Ourense, Spain; jmlorenzo@ceteca.net (J.M.L.)

<sup>5</sup> Área de Tecnología de los Alimentos, Facultad de Ciencias de Ourense, Universidad de Vigo, 32004 Ourense, Spain

\* Correspondence: duangjai.tun@mahidol.ac.th (D.T.) ; hano@univ-orleans.fr (C.H.)

## Content:

**Figure S1.** The collected seeds of Fabaceae species in Thailand: A. *Pisum sativum* L. cv. round pod; B. *Pisum sativum* L. cv. flat pod; C. *Cajanus cajan* (L.) Millsp.; D. *Glycine max* (L.) Merr.; E. *Phaseolus vulgaris* L. cv. white kidney beans; F. *Phaseolus vulgaris* L. cv. red kidney bean; G. *Vigna angularis* (Willd.) Ohwi & H. Ohashi; H. *Vigna mungo* (L.) Hepper; I. *Vigna radiata* (L.) R. Wilczek; J. *Vigna unguiculata* (L.) Walp.; K. *Vigna unguiculata* subsp. *sesquipedalis* (L.) Verdc.; L. *Arachis hypogaea* L.; Bar scale = 1 cm. The photos were taken by D.T. in Thailand

**Figure S2:** Typical HPLC chromatograms of the different Fabaceae species/subspecies.

**Table S1.** Pearson correlation coefficient linking phytochemicals and antioxidant activity of ethanolic extracts of 50 Fabaceae populations from various floristic regions from Thailand.

**Table S2.** Intraspecific Pearson correlation coefficient linking isoflavone (daidzein and genistein) content and antioxidant activity of ethanolic extracts of 50 Fabaceae populations from various floristic regions from Thailand.

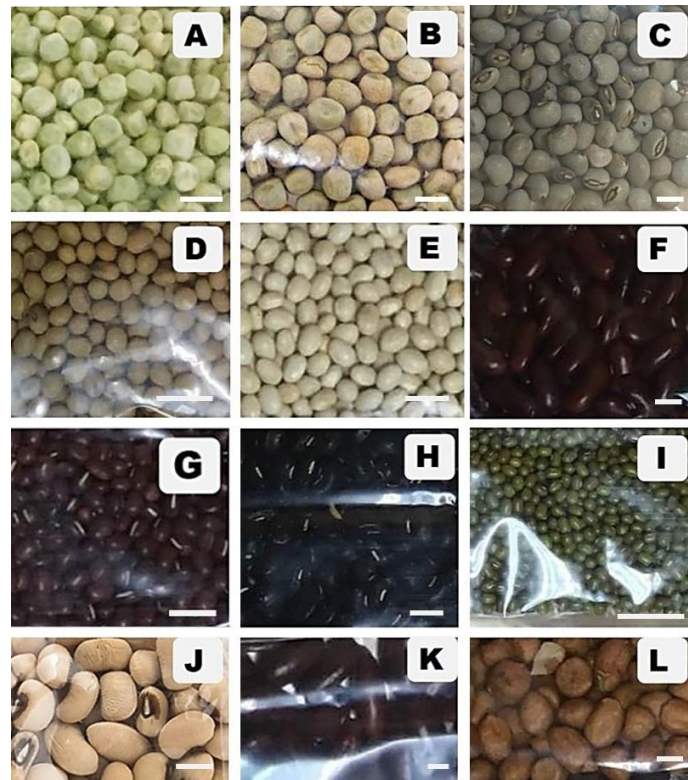

**Figure S1.** The collected seeds of Fabaceae species in Thailand: A. *Pisum sativum* L. cv. round pod; B. *Pisum sativum* L. cv. flat pod; C. *Cajanus cajan* (L.) Millsp.; D. *Glycine max* (L.) Merr.; E. *Phaseolus vulgaris* L. cv. white kidney beans; F. *Phaseolus vulgaris* L. cv. red kidney bean; G. *Vigna angularis* (Willd.) Ohwi & H. Ohashi; H. *Vigna mungo* (L.) Hepper; I. *Vigna radiata* (L.) R. Wilczek ; J. *Vigna unguiculata* (L.) Walp.; K. *Vigna unguiculata* subsp. *sesquipedalis* (L.) Verdc. ; L. *Arachis hypogaea* L.; Bar scale = 1 cm. The photos were taken by D.T. in Thailand

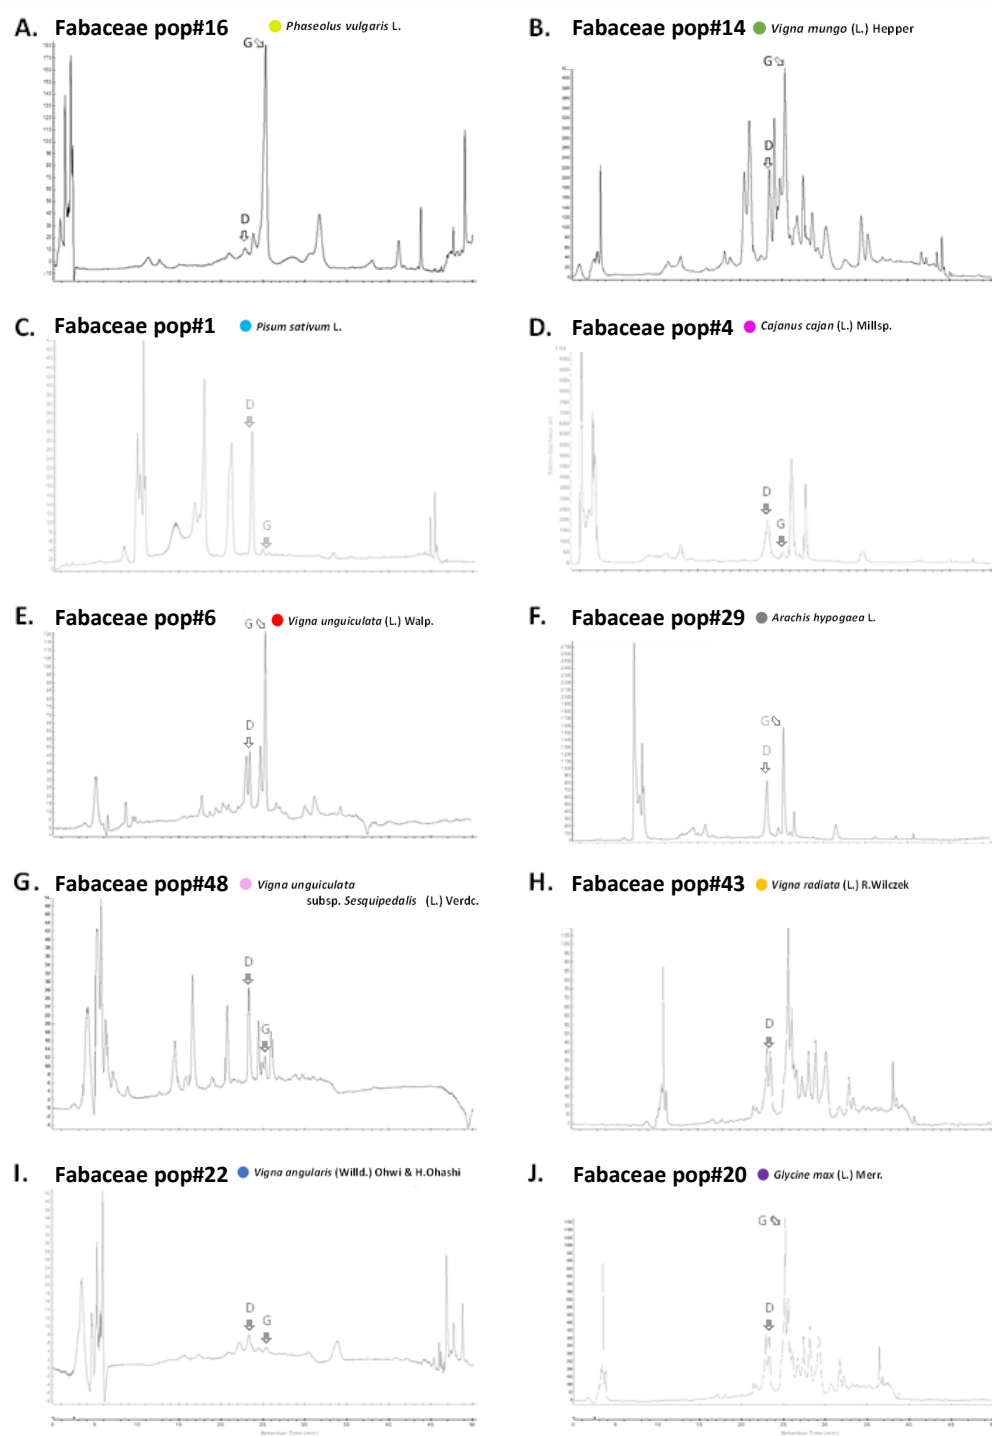

**Figure S2:** Typical HPLC chromatograms of the different Fabaceae species/subspecies.

**Table S1.** Pearson correlation coefficient linking phytochemicals and antioxidant activity of ethanolic extracts of 50 Fabaceae populations from various floristic regions from Thailand.

|      | TPC       | TFC       | TAC       | DAD       | GEN       | DPPH      | ABTS      | FRAP      | CAA |
|------|-----------|-----------|-----------|-----------|-----------|-----------|-----------|-----------|-----|
| TPC  |           |           |           |           |           |           |           |           |     |
| TFC  | 0.748 *** |           |           |           |           |           |           |           |     |
| TAC  | 0.691 *** | 0.929 *** |           |           |           |           |           |           |     |
| DAD  | 0.088 ns  | -0.161 ns | -0.046 ns |           |           |           |           |           |     |
| GEN  | 0.085 ns  | -0.165 ns | -0.063 ns | 0.983 *** |           |           |           |           |     |
| DPPH | 0.389 **  | 0.625 *** | 0.614 *** | 0.145 ns  | 0.125 ns  |           |           |           |     |
| ABTS | 0.381 **  | 0.625 *** | 0.631 *** | 0.163 ns  | 0.143 ns  | 0.947 *   |           |           |     |
| FRAP | 0.764 *** | 0.733 *** | 0.648 *** | -0.241 ns | -0.246 ns | 0.342 *** | 0.340 *** |           |     |
| CAA  | 0.650 *** | 0.650 *** | 0.606 *** | -0.065 ns | -0.077 ns | 0.514 *** | 0.518 *** | 0.907 *** |     |

\*\*\* significant  $p < 0.001$ ; \*\* significant  $p < 0.01$ ; \* significant  $p < 0.05$ ; ns: non-significant  $p > 0.05$ . TPC: total phenolic content; TFC: total flavonoid content; TAC: total anthocyanin content; DAD: dadzein content; GEN: genistein content; DPPH: in vitro antioxidant DPPH assay; ABTS: in vitro antioxidant ABTS assay; FRAP: in vitro antioxidant FRAP assay; CAA: cellular antioxidant assay.

**Table S2.** Intraspecific Pearson correlation coefficient linking isoflavone (daidzein and genistein) content and antioxidant activity of ethanolic extracts of 50 Fabaceae populations from various floristic regions from Thailand.

|                                                                  | DPPH      | ABTS      | FRAP      | CAA       |
|------------------------------------------------------------------|-----------|-----------|-----------|-----------|
| <i>Arachis hypogaea</i> L.                                       |           |           |           |           |
| DAD                                                              | -0.569 ns | -0.568 ns | 0.983 **  | 0.981 **  |
| GEN                                                              | -0.635 ns | -0.635 ns | 0.982 **  | 0.998 *** |
| <i>Cajanus cajan</i> (L.) Millsp.                                |           |           |           |           |
| DAD                                                              | 0.999 *   | 0.99987** | 0.999 **  | 0.999 **  |
| GEN                                                              | 0.999 *   | 0.99823*  | 0.997 *   | 0.997 *   |
| <i>Glycine max</i> (L.) Merr.                                    |           |           |           |           |
| DAD                                                              | -0.172 ns | -0.172 ns | 0.568 ns  | 0.362 ns  |
| GEN                                                              | -0.543 ns | -0.543 ns | 0.461 ns  | 0.084 ns  |
| <i>Phaseolus vulgaris</i> L. cv. red kidney bean                 |           |           |           |           |
| DAD                                                              | 0.015 ns  | 0.015 ns  | 0.031 ns  | 0.105 ns  |
| GEN                                                              | 0.057 ns  | 0.057 ns  | 0.108 ns  | 0.177 ns  |
| <i>Pisum sativum</i> L.                                          |           |           |           |           |
| DAD                                                              | 0.999 *** | 0.999 *** | 0.999 *** | 0.999 *** |
| GEN                                                              | 0.999 *   | 0.999 *   | 0.999 *** | 0.999 *** |
| <i>Vigna angularis</i> (Willd.) Ohwi & H. Ohashi                 |           |           |           |           |
| DAD                                                              | 0.887 *   | 0.887 *   | 0.580 ns  | 0.846 *   |
| GEN                                                              | 0.911 *   | 0.911 *   | 0.671 ns  | 0.898 *   |
| <i>Vigna mungo</i> (L.) Hepper                                   |           |           |           |           |
| DAD                                                              | 0.373 ns  | 0.373 ns  | 0.963 **  | 0.941 **  |
| GEN                                                              | 0.489 ns  | 0.489 ns  | 0.983 *** | 0.976 *** |
| <i>Vigna radiata</i> (L.) R. Wilczek                             |           |           |           |           |
| DAD                                                              | 0.458 ns  | 0.458 ns  | 0.763 ns  | 0.773 ns  |
| GEN                                                              | 0.218 ns  | 0.218 ns  | 0.518 ns  | 0.516 ns  |
| <i>Vigna unguiculata</i> (L.) Walp.                              |           |           |           |           |
| DAD                                                              | 0.998 *   | -0.999 *  | 0.999 *   | -0.995 ns |
| GEN                                                              | 0.979 ns  | -0.985 ns | 0.982 ns  | -0.971 ns |
| <i>Vigna unguiculata</i> subsp. <i>Sesquipedalis</i> (L.) Verdc. |           |           |           |           |
| DAD                                                              | 0.733 ns  | 0.733 ns  | 0.083 ns  | 0.691 ns  |
| GEN                                                              | 0.911 ns  | 0.911 ns  | 0.342 ns  | 0.884 ns  |

\*\*\* significant  $p < 0.001$ ; \*\* significant  $p < 0.01$ ; \* significant  $p < 0.05$ ; ns: non-significant  $p > 0.05$ . DAD: daidzein content; GEN: genistein content; DPPH: in vitro antioxidant DPPH assay; ABTS: in vitro antioxidant ABTS assay; FRAP: in vitro antioxidant FRAP assay; CAA: cellular antioxidant assay.
